# Supplementary material for: Attraction of Lutzomyia longipalpis to synthetic sex-aggregation pheromone: Effect of release rate and proximity of adjacent pheromone sources
Source: PubMed Central journal article supplement (PMC6300254; doi:10.1371/journal.pntd.0007007), 2018-12-19
Supplement: pntd.0007007.s001.pdf [file pntd.0007007.s001.pdf]

S1 Table

Raw data from Experiment 1 - experimental traps treated with 2, 5, 10, 20 or 50 lures, cont

Distance between test and control traps = 30m.

| Date       | replicate | HHID | Name     | Position | distance apart | Treatment   | Males |
|------------|-----------|------|----------|----------|----------------|-------------|-------|
| 08/08/2016 | 1         | 1    | Leonidia | A        | 30m            | 1 pheromone | 6     |
| 08/08/2016 | 1         | 1    | Leonidia | B        | 30m            | 2 pheromone | 14    |
| 08/08/2016 | 1         | 2    | Arlan    | A        | 30m            | 1 pheromone | 4     |
| 08/08/2016 | 1         | 2    | Arlan    | B        | 30m            | 2 pheromone | 29    |
| 09/08/2016 | 2         | 1    | Leonidia | A        | 30m            | 2 pheromone | 11    |
| 09/08/2016 | 2         | 1    | Leonidia | B        | 30m            | 1 pheromone | 0     |
| 09/08/2016 | 2         | 2    | Arlan    | A        | 30m            | 2 pheromone | 3     |
| 09/08/2016 | 2         | 2    | Arlan    | B        | 30m            | 1 pheromone | 9     |
| 10/08/2016 | 3         | 1    | Leonidia | A        | 30m            | 1 pheromone | 9     |
| 10/08/2016 | 3         | 1    | Leonidia | B        | 30m            | 2 pheromone | 15    |
| 10/08/2016 | 3         | 2    | Arlan    | A        | 30m            | 1 pheromone | 3     |
| 10/08/2016 | 3         | 2    | Arlan    | B        | 30m            | 2 pheromone | 19    |
| 11/08/2016 | 4         | 1    | Leonidia | A        | 30m            | 2 pheromone | 5     |
| 11/08/2016 | 4         | 1    | Leonidia | B        | 30m            | 1 pheromone | 2     |
| 11/08/2016 | 4         | 2    | Arlan    | A        | 30m            | 2 pheromone | 6     |
| 11/08/2016 | 4         | 2    | Arlan    | B        | 30m            | 1 pheromone | 10    |
| 15/08/2016 | 5         | 1    | Leonidia | A        | 30m            | 1 pheromone | 0     |
| 15/08/2016 | 5         | 1    | Leonidia | B        | 30m            | 2 pheromone | 4     |
| 15/08/2016 | 5         | 2    | Arlan    | A        | 30m            | 1 pheromone | 5     |
| 15/08/2016 | 5         | 2    | Arlan    | B        | 30m            | 2 pheromone | 11    |
| 16/08/2016 | 6         | 1    | Leonidia | A        | 30m            | 2 pheromone | 10    |
| 16/08/2016 | 6         | 1    | Leonidia | B        | 30m            | 1 pheromone | 23    |
| 16/08/2016 | 6         | 2    | Arlan    | A        | 30m            | 2 pheromone | 11    |
| 16/08/2016 | 6         | 2    | Arlan    | B        | 30m            | 1 pheromone | 5     |
| 05/09/2016 | 1         | 3    | Marcelo  | A        | 30m            | 1 pheromone | 3     |
| 05/09/2016 | 1         | 3    | Marcelo  | B        | 30m            | 5 pheromone | 42    |
| 05/09/2016 | 1         | 2    | Arlan    | A        | 30m            | 1 pheromone | 9     |
| 05/09/2016 | 1         | 2    | Arlan    | B        | 30m            | 5 pheromone | 34    |
| 06/09/2016 | 2         | 3    | Marcelo  | A        | 30m            | 5 pheromone | 3     |
| 06/09/2016 | 2         | 3    | Marcelo  | B        | 30m            | 1 pheromone | 14    |
| 06/09/2016 | 2         | 2    | Arlan    | A        | 30m            | 5 pheromone | 23    |
| 06/09/2016 | 2         | 2    | Arlan    | B        | 30m            | 1 pheromone | 7     |
| 07/09/2016 | 3         | 3    | Marcelo  | A        | 30m            | 1 pheromone | 3     |
| 07/09/2016 | 3         | 3    | Marcelo  | B        | 30m            | 5 pheromone | 48    |
| 07/09/2016 | 3         | 2    | Arlan    | A        | 30m            | 1 pheromone | 13    |
| 07/09/2016 | 3         | 2    | Arlan    | B        | 30m            | 5 pheromone | 41    |
| 08/09/2016 | 4         | 3    | Marcelo  | A        | 30m            | 5 pheromone | 1     |
| 08/09/2016 | 4         | 3    | Marcelo  | B        | 30m            | 1 pheromone | 22    |
| 08/09/2016 | 4         | 2    | Arlan    | A        | 30m            | 1 pheromone | 12    |
| 08/09/2016 | 4         | 2    | Arlan    | B        | 30m            | 5 pheromone | 36    |
| 12/09/2016 | 5         | 3    | Marcelo  | A        | 30m            | 1 pheromone | 1     |
| 12/09/2016 | 5         | 3    | Marcelo  | B        | 30m            | 5 pheromone | 29    |

|            |   |   |         |   |     |             |    |
|------------|---|---|---------|---|-----|-------------|----|
| 12/09/2016 | 5 | 2 | Arlan   | A | 30m | 5 pheromone | 22 |
| 12/09/2016 | 5 | 2 | Arlan   | B | 30m | 1 pheromone | 8  |
| 13/09/2016 | 6 | 3 | Marcelo | A | 30m | 5 pheromone | 6  |
| 13/09/2016 | 6 | 3 | Marcelo | B | 30m | 1 pheromone | 2  |
| 13/09/2016 | 6 | 2 | Arlan   | A | 30m | 5 pheromone | 27 |
| 13/09/2016 | 6 | 2 | Arlan   | B | 30m | 1 pheromone | 7  |

|            |   |   |         |   |     |              |     |
|------------|---|---|---------|---|-----|--------------|-----|
| 27/07/2016 | 1 | 3 | Marcelo | A | 30m | 10 pheromone | 8   |
| 27/07/2016 | 1 | 3 | Marcelo | B | 30m | 1 pheromone  | 6   |
| 27/07/2016 | 1 | 4 | Carlos  | A | 30m | 10 pheromone | 171 |
| 27/07/2016 | 1 | 4 | Carlos  | B | 30m | 1 pheromone  | 19  |
| 28/07/2016 | 2 | 3 | Marcelo | A | 30m | 1 pheromone  | 5   |
| 28/07/2016 | 2 | 3 | Marcelo | B | 30m | 10 pheromone | 60  |
| 28/07/2016 | 2 | 4 | Carlos  | A | 30m | 1 pheromone  | 38  |
| 28/07/2016 | 2 | 4 | Carlos  | B | 30m | 10 pheromone | 93  |
| 01/08/2016 | 3 | 3 | Marcelo | A | 30m | 10 pheromone | 6   |
| 01/08/2016 | 3 | 3 | Marcelo | B | 30m | 1 pheromone  | 2   |
| 01/08/2016 | 3 | 4 | Carlos  | A | 30m | 10 pheromone | 45  |
| 01/08/2016 | 3 | 4 | Carlos  | B | 30m | 1 pheromone  | 27  |
| 02/08/2016 | 4 | 3 | Marcelo | A | 30m | 1 pheromone  | 0   |
| 02/08/2016 | 4 | 3 | Marcelo | B | 30m | 10 pheromone | 25  |
| 02/08/2016 | 4 | 4 | Carlos  | A | 30m | 1 pheromone  | 16  |
| 02/08/2016 | 4 | 4 | Carlos  | B | 30m | 10 pheromone | 4   |
| 03/08/2016 | 5 | 3 | Marcelo | A | 30m | 10 pheromone | 1   |
| 03/08/2016 | 5 | 3 | Marcelo | B | 30m | 1 pheromone  | 14  |
| 03/08/2016 | 5 | 4 | Carlos  | A | 30m | 10 pheromone | 65  |
| 03/08/2016 | 5 | 4 | Carlos  | B | 30m | 1 pheromone  | 4   |
| 04/08/2016 | 6 | 3 | Marcelo | A | 30m | 1 pheromone  | 0   |
| 04/08/2016 | 6 | 3 | Marcelo | B | 30m | 10 pheromone | 36  |
| 04/08/2016 | 6 | 4 | Carlos  | A | 30m | 1 pheromone  | 12  |
| 04/08/2016 | 6 | 4 | Carlos  | B | 30m | 10 pheromone | 17  |

|            |   |   |          |   |     |              |    |
|------------|---|---|----------|---|-----|--------------|----|
| 27/07/2016 | 1 | 1 | Leonidia | A | 30m | 20 pheromone | 25 |
| 27/07/2016 | 1 | 1 | Leonidia | B | 30m | 1 pheromone  | 6  |
| 27/07/2016 | 1 | 2 | Arlan    | A | 30m | 20 pheromone | 12 |
| 27/07/2016 | 1 | 2 | Arlan    | B | 30m | 1 pheromone  | 11 |
| 28/07/2016 | 2 | 1 | Leonidia | A | 30m | 1 pheromone  | 3  |
| 28/07/2016 | 2 | 1 | Leonidia | B | 30m | 20 pheromone | 47 |
| 28/07/2016 | 2 | 2 | Arlan    | A | 30m | 1 pheromone  | 2  |
| 28/07/2016 | 2 | 2 | Arlan    | B | 30m | 20 pheromone | 16 |
| 01/08/2016 | 3 | 1 | Leonidia | A | 30m | 20 pheromone | 17 |
| 01/08/2016 | 3 | 1 | Leonidia | B | 30m | 1 pheromone  | 4  |
| 01/08/2016 | 3 | 2 | Arlan    | A | 30m | 20 pheromone | 10 |
| 01/08/2016 | 3 | 2 | Arlan    | B | 30m | 1 pheromone  | 14 |
| 02/08/2016 | 4 | 1 | Leonidia | A | 30m | 1 pheromone  | 6  |
| 02/08/2016 | 4 | 1 | Leonidia | B | 30m | 20 pheromone | 74 |
| 03/08/2016 | 4 | 2 | Arlan    | A | 30m | 20 pheromone | 6  |
| 03/08/2016 | 4 | 2 | Arlan    | B | 30m | 1 pheromone  | 6  |
| 03/08/2016 | 5 | 1 | Leonidia | A | 30m | 20 pheromone | 58 |
| 03/08/2016 | 5 | 1 | Leonidia | B | 30m | 1 pheromone  | 3  |
| 04/08/2016 | 5 | 2 | Arlan    | A | 30m | 1 pheromone  | 2  |
| 04/08/2016 | 5 | 2 | Arlan    | B | 30m | 20 pheromone | 24 |

|            |   |   |          |   |     |              |    |
|------------|---|---|----------|---|-----|--------------|----|
| 04/08/2016 | 6 | 1 | Leonidia | A | 30m | 1 pheromone  | 3  |
| 04/08/2016 | 6 | 1 | Leonidia | B | 30m | 20 pheromone | 37 |
| 05/08/2016 | 6 | 2 | Arlan    | A | 30m | 20 pheromone | 38 |
| 05/08/2016 | 6 | 2 | Arlan    | B | 30m | 1 pheromone  | 2  |

---

|            |   |   |         |   |     |              |     |
|------------|---|---|---------|---|-----|--------------|-----|
| 08/08/2016 | 1 | 3 | Marcelo | A | 30m | 1 pheromone  | 1   |
| 08/08/2016 | 1 | 3 | Marcelo | B | 30m | 50 pheromone | 83  |
| 08/08/2016 | 1 | 4 | Carlos  | A | 30m | 1 pheromone  | 56  |
| 08/08/2016 | 1 | 4 | Carlos  | B | 30m | 50 pheromone | 85  |
| 09/08/2016 | 2 | 3 | Marcelo | A | 30m | 50 pheromone | 2   |
| 09/08/2016 | 2 | 3 | Marcelo | B | 30m | 1 pheromone  | 8   |
| 09/08/2016 | 2 | 4 | Carlos  | A | 30m | 50 pheromone | 88  |
| 09/08/2016 | 2 | 4 | Carlos  | B | 30m | 1 pheromone  | 1   |
| 10/08/2016 | 3 | 3 | Marcelo | A | 30m | 1 pheromone  | 2   |
| 10/08/2016 | 3 | 3 | Marcelo | B | 30m | 50 pheromone | 51  |
| 10/08/2016 | 3 | 4 | Carlos  | A | 30m | 1 pheromone  | 41  |
| 10/08/2016 | 3 | 4 | Carlos  | B | 30m | 50 pheromone | 73  |
| 11/08/2016 | 4 | 3 | Marcelo | A | 30m | 50 pheromone | 4   |
| 11/08/2016 | 4 | 3 | Marcelo | B | 30m | 1 pheromone  | 8   |
| 11/08/2016 | 4 | 4 | Carlos  | A | 30m | 50 pheromone | 76  |
| 11/08/2016 | 4 | 4 | Carlos  | B | 30m | 1 pheromone  | 4   |
| 15/08/2016 | 5 | 3 | Marcelo | A | 30m | 1 pheromone  | 0   |
| 15/08/2016 | 5 | 3 | Marcelo | B | 30m | 50 pheromone | 54  |
| 15/08/2016 | 5 | 4 | Carlos  | A | 30m | 1 pheromone  | 30  |
| 15/08/2016 | 5 | 4 | Carlos  | B | 30m | 50 pheromone | 109 |
| 16/08/2016 | 6 | 3 | Marcelo | A | 30m | 50 pheromone | 24  |
| 16/08/2016 | 6 | 3 | Marcelo | B | 30m | 1 pheromone  | 2   |
| 16/08/2016 | 6 | 4 | Carlos  | A | 30m | 50 pheromone | 116 |
| 16/08/2016 | 6 | 4 | Carlos  | B | 30m | 1 pheromone  | 4   |

---

rol traps = 1 lure.

| Females | Total |
|---------|-------|
| 5       | 11    |
| 9       | 23    |
| 5       | 9     |
| 22      | 51    |
| 3       | 14    |
| 0       | 0     |
| 2       | 5     |
| 9       | 18    |
| 2       | 11    |
| 4       | 19    |
| 2       | 5     |
| 8       | 27    |
| 0       | 5     |
| 3       | 5     |
| 2       | 8     |
| 4       | 14    |
| 0       | 0     |
| 3       | 7     |
| 0       | 5     |
| 2       | 13    |
| 0       | 10    |
| 8       | 31    |
| 2       | 13    |
| 5       | 10    |
| <hr/>   |       |
| 0       | 3     |
| 14      | 56    |
| 0       | 9     |
| 5       | 39    |
| 1       | 4     |
| 2       | 16    |
| 7       | 30    |
| 5       | 12    |
| 0       | 3     |
| 17      | 65    |
| 7       | 20    |
| 25      | 66    |
| 2       | 3     |
| 4       | 26    |
| 3       | 15    |
| 10      | 46    |
| 1       | 2     |
| 11      | 40    |

|    |    |
|----|----|
| 2  | 24 |
| 0  | 8  |
| 2  | 8  |
| 6  | 8  |
| 11 | 38 |
| 3  | 10 |

---

|    |     |
|----|-----|
| 0  | 8   |
| 2  | 8   |
| 58 | 229 |
| 3  | 22  |
| 2  | 7   |
| 16 | 76  |
| 15 | 53  |
| 23 | 116 |
| 1  | 7   |
| 1  | 3   |
| 24 | 69  |
| 4  | 31  |
| 3  | 3   |
| 5  | 30  |
| 11 | 27  |
| 2  | 6   |
| 6  | 7   |
| 8  | 22  |
| 19 | 84  |
| 0  | 4   |
| 0  | 0   |
| 6  | 42  |
| 7  | 19  |
| 7  | 24  |

---

|    |    |
|----|----|
| 13 | 38 |
| 2  | 8  |
| 4  | 16 |
| 2  | 13 |
| 0  | 3  |
| 5  | 52 |
| 2  | 4  |
| 4  | 20 |
| 10 | 27 |
| 0  | 4  |
| 8  | 18 |
| 2  | 16 |
| 1  | 7  |
| 18 | 92 |
| 12 | 18 |
| 2  | 8  |
| 19 | 77 |
| 2  | 5  |
| 1  | 3  |
| 13 | 37 |

|    |    |
|----|----|
| 1  | 4  |
| 9  | 46 |
| 25 | 63 |
| 1  | 3  |

---

---

|    |     |
|----|-----|
| 1  | 2   |
| 29 | 112 |
| 8  | 64  |
| 15 | 100 |
| 6  | 8   |
| 1  | 9   |
| 31 | 119 |
| 2  | 3   |
| 2  | 4   |
| 17 | 68  |
| 7  | 48  |
| 18 | 91  |
| 2  | 6   |
| 1  | 9   |
| 27 | 103 |
| 2  | 6   |
| 0  | 0   |
| 18 | 72  |
| 14 | 44  |
| 31 | 140 |
| 10 | 34  |
| 0  | 2   |
| 31 | 147 |
| 1  | 5   |

---
