# Supplementary material for: Attraction of Lutzomyia longipalpis to synthetic sex-aggregation pheromone: Effect of release rate and proximity of adjacent pheromone sources
Source: PubMed Central journal article supplement (PMC6300254; doi:10.1371/journal.pntd.0007007), 2018-12-19
Supplement: pntd.0007007.s002.pdf [file pntd.0007007.s002.pdf]

## S2 Table

Raw data from Experiment 2 traps set 5, 10, 20 or 30 m apart

control trap = 1 lure      test trap = 5 lures

| Date       | replicate | HHID | Name     | Position | distance<br>apart | Treatment   |
|------------|-----------|------|----------|----------|-------------------|-------------|
| 07/07/2016 | 1         | 1    | Leonidia | A        | 5m                | 1 Pheromone |
| 07/07/2016 | 1         | 1    | Leonidia | B        | 5m                | 5 Pheromone |
| 07/07/2016 | 1         | 3    | Marcelo  | A        | 5m                | 1 Pheromone |
| 07/07/2016 | 1         | 3    | Marcelo  | B        | 5m                | 5 Pheromone |
| 11/07/2016 | 2         | 1    | Leonidia | A        | 5m                | 5 Pheromone |
| 11/07/2016 | 2         | 1    | Leonidia | B        | 5m                | 1 Pheromone |
| 11/07/2016 | 2         | 3    | Marcelo  | A        | 5m                | 5 Pheromone |
| 11/07/2016 | 2         | 3    | Marcelo  | B        | 5m                | 1 Pheromone |
| 12/07/2016 | 3         | 1    | Leonidia | A        | 5m                | 1 Pheromone |
| 12/07/2016 | 3         | 1    | Leonidia | B        | 5m                | 5 Pheromone |
| 12/07/2016 | 3         | 3    | Marcelo  | A        | 5m                | 1 Pheromone |
| 12/07/2016 | 3         | 3    | Marcelo  | B        | 5m                | 5 Pheromone |
| 13/07/2016 | 4         | 1    | Leonidia | A        | 5m                | 5 Pheromone |
| 13/07/2016 | 4         | 1    | Leonidia | B        | 5m                | 1 Pheromone |
| 13/07/2016 | 4         | 3    | Marcelo  | A        | 5m                | 5 Pheromone |
| 13/07/2016 | 4         | 3    | Marcelo  | B        | 5m                | 1 Pheromone |
| 14/07/2016 | 5         | 1    | Leonidia | A        | 5m                | 1 Pheromone |
| 14/07/2016 | 5         | 1    | Leonidia | B        | 5m                | 5 Pheromone |
| 14/07/2016 | 5         | 3    | Marcelo  | A        | 5m                | 1 Pheromone |
| 14/07/2016 | 5         | 3    | Marcelo  | B        | 5m                | 5 Pheromone |
| 15/07/2016 | 6         | 1    | Leonidia | A        | 5m                | 5 Pheromone |
| 15/07/2016 | 6         | 1    | Leonidia | B        | 5m                | 1 Pheromone |
| 15/07/2016 | 6         | 3    | Marcelo  | A        | 5m                | 5 Pheromone |
| 15/07/2016 | 6         | 3    | Marcelo  | B        | 5m                | 1 Pheromone |
| 18/07/2016 | 1         | 2    | Arlan    | A        | 10m               | 1 Pheromone |
| 18/07/2016 | 1         | 2    | Arlan    | B        | 10m               | 5 Pheromone |
| 18/07/2016 | 1         | 4    | Carlos   | A        | 10m               | 1 Pheromone |
| 18/07/2016 | 1         | 4    | Carlos   | B        | 10m               | 5 Pheromone |
| 19/07/2016 | 2         | 2    | Arlan    | A        | 10m               | 5 Pheromone |
| 19/07/2016 | 2         | 2    | Arlan    | B        | 10m               | 1 Pheromone |
| 19/07/2016 | 2         | 4    | Carlos   | A        | 10m               | 5 Pheromone |
| 19/07/2016 | 2         | 4    | Carlos   | B        | 10m               | 1 Pheromone |
| 20/07/2016 | 3         | 2    | Arlan    | A        | 10m               | 1 Pheromone |
| 20/07/2016 | 3         | 2    | Arlan    | B        | 10m               | 5 Pheromone |
| 20/07/2016 | 3         | 4    | Carlos   | A        | 10m               | 1 Pheromone |
| 20/07/2016 | 3         | 4    | Carlos   | B        | 10m               | 5 Pheromone |
| 21/07/2016 | 4         | 2    | Arlan    | A        | 10m               | 5 Pheromone |
| 21/07/2016 | 4         | 2    | Arlan    | B        | 10m               | 1 Pheromone |

|            |   |   |        |   |     |             |
|------------|---|---|--------|---|-----|-------------|
| 21/07/2016 | 4 | 4 | Carlos | A | 10m | 5 Pheromone |
| 21/07/2016 | 4 | 4 | Carlos | B | 10m | 1 Pheromone |
| 25/07/2016 | 5 | 2 | Arlan  | A | 10m | 1 Pheromone |
| 25/07/2016 | 5 | 2 | Arlan  | B | 10m | 5 Pheromone |
| 25/07/2016 | 5 | 4 | Carlos | A | 10m | 1 Pheromone |
| 25/07/2016 | 5 | 4 | Carlos | B | 10m | 5 Pheromone |
| 26/07/2016 | 6 | 2 | Arlan  | A | 10m | 5 Pheromone |
| 26/07/2016 | 6 | 2 | Arlan  | B | 10m | 1 Pheromone |
| 26/07/2016 | 6 | 4 | Carlos | A | 10m | 5 Pheromone |
| 26/07/2016 | 6 | 4 | Carlos | B | 10m | 1 Pheromone |

---

|            |   |   |          |   |     |             |
|------------|---|---|----------|---|-----|-------------|
| 18/07/2016 | 1 | 1 | Leonidia | A | 20m | 1 Pheromone |
| 18/07/2016 | 1 | 1 | Leonidia | B | 20m | 5 Pheromone |
| 18/07/2016 | 1 | 3 | Marcelo  | A | 20m | 1 Pheromone |
| 18/07/2016 | 1 | 3 | Marcelo  | B | 20m | 5 Pheromone |
| 19/07/2016 | 2 | 1 | Leonidia | A | 20m | 5 Pheromone |
| 19/07/2016 | 2 | 1 | Leonidia | B | 20m | 1 Pheromone |
| 19/07/2016 | 2 | 3 | Marcelo  | A | 20m | 5 Pheromone |
| 19/07/2016 | 2 | 3 | Marcelo  | B | 20m | 1 Pheromone |
| 20/07/2016 | 3 | 1 | Leonidia | A | 20m | 1 Pheromone |
| 20/07/2016 | 3 | 1 | Leonidia | B | 20m | 5 Pheromone |
| 20/07/2016 | 3 | 3 | Marcelo  | A | 20m | 1 Pheromone |
| 20/07/2016 | 3 | 3 | Marcelo  | B | 20m | 5 Pheromone |
| 21/07/2016 | 4 | 1 | Leonidia | A | 20m | 5 Pheromone |
| 21/07/2016 | 4 | 1 | Leonidia | B | 20m | 1 Pheromone |
| 21/07/2016 | 4 | 3 | Marcelo  | A | 20m | 5 Pheromone |
| 21/07/2016 | 4 | 3 | Marcelo  | B | 20m | 1 Pheromone |
| 25/07/2016 | 5 | 1 | Leonidia | A | 20m | 1 Pheromone |
| 25/07/2016 | 5 | 1 | Leonidia | B | 20m | 5 Pheromone |
| 25/07/2016 | 5 | 3 | Marcelo  | A | 20m | 1 Pheromone |
| 25/07/2016 | 5 | 3 | Marcelo  | B | 20m | 5 Pheromone |
| 26/07/2016 | 6 | 1 | Leonidia | A | 20m | 5 Pheromone |
| 26/07/2016 | 6 | 1 | Leonidia | B | 20m | 1 Pheromone |
| 26/07/2016 | 6 | 3 | Marcelo  | A | 20m | 5 Pheromone |
| 26/07/2016 | 6 | 3 | Marcelo  | B | 20m | 1 Pheromone |

---

|            |   |   |         |   |     |             |
|------------|---|---|---------|---|-----|-------------|
| 05/09/2016 | 1 | 3 | Marcelo | A | 30m | 1 Pheromone |
| 05/09/2016 | 1 | 3 | Marcelo | B | 30m | 5 Pheromone |
| 05/09/2016 | 1 | 2 | Arlan   | A | 30m | 1 Pheromone |
| 05/09/2016 | 1 | 2 | Arlan   | B | 30m | 5 Pheromone |
| 06/09/2016 | 2 | 3 | Marcelo | A | 30m | 5 Pheromone |
| 06/09/2016 | 2 | 3 | Marcelo | B | 30m | 1 Pheromone |
| 06/09/2016 | 2 | 2 | Arlan   | A | 30m | 5 Pheromone |
| 06/09/2016 | 2 | 2 | Arlan   | B | 30m | 1 Pheromone |
| 07/09/2016 | 3 | 3 | Marcelo | A | 30m | 1 Pheromone |
| 07/09/2016 | 3 | 3 | Marcelo | B | 30m | 5 Pheromone |
| 07/09/2016 | 3 | 2 | Arlan   | A | 30m | 1 Pheromone |
| 07/09/2016 | 3 | 2 | Arlan   | B | 30m | 5 Pheromone |

|            |   |   |         |   |     |             |
|------------|---|---|---------|---|-----|-------------|
| 08/09/2016 | 4 | 3 | Marcelo | A | 30m | 5 Pheromone |
| 08/09/2016 | 4 | 3 | Marcelo | B | 30m | 1 Pheromone |
| 08/09/2016 | 4 | 2 | Arlan   | A | 30m | 1 Pheromone |
| 08/09/2016 | 4 | 2 | Arlan   | B | 30m | 5 Pheromone |
| 12/09/2016 | 5 | 3 | Marcelo | A | 30m | 1 Pheromone |
| 12/09/2016 | 5 | 3 | Marcelo | B | 30m | 5 Pheromone |
| 12/09/2016 | 5 | 2 | Arlan   | A | 30m | 5 Pheromone |
| 12/09/2016 | 5 | 2 | Arlan   | B | 30m | 1 Pheromone |
| 13/09/2016 | 6 | 3 | Marcelo | A | 30m | 5 Pheromone |
| 13/09/2016 | 6 | 3 | Marcelo | B | 30m | 1 Pheromone |
| 13/09/2016 | 6 | 2 | Arlan   | A | 30m | 5 Pheromone |
| 13/09/2016 | 6 | 2 | Arlan   | B | 30m | 1 Pheromone |

---

| Males | Females | Total |
|-------|---------|-------|
| 7     | 2       | 9     |
| 26    | 11      | 37    |
| 3     | 1       | 4     |
| 24    | 5       | 29    |
| 8     | 7       | 15    |
| 0     | 1       | 1     |
| 11    | 2       | 13    |
| 4     | 1       | 5     |
| 2     | 2       | 4     |
| 7     | 1       | 8     |
| 1     | 2       | 3     |
| 5     | 5       | 10    |
| 20    | 5       | 25    |
| 0     | 1       | 1     |
| 5     | 2       | 7     |
| 3     | 0       | 3     |
| 4     | 3       | 7     |
| 36    | 7       | 43    |
| 1     | 0       | 1     |
| 6     | 0       | 6     |
| 17    | 9       | 26    |
| 7     | 2       | 9     |
| 3     | 3       | 6     |
| 3     | 0       | 3     |

|    |    |    |
|----|----|----|
| 6  | 4  | 10 |
| 13 | 1  | 14 |
| 13 | 3  | 16 |
| 59 | 15 | 74 |
| 13 | 12 | 25 |
| 1  | 0  | 1  |
| 38 | 5  | 43 |
| 21 | 5  | 26 |
| 3  | 5  | 8  |
| 8  | 2  | 10 |
| 5  | 0  | 5  |
| 39 | 14 | 53 |
| 37 | 13 | 50 |
| 7  | 3  | 10 |

|    |    |    |
|----|----|----|
| 31 | 6  | 37 |
| 12 | 1  | 13 |
| 1  | 0  | 1  |
| 16 | 2  | 18 |
| 4  | 1  | 5  |
| 50 | 11 | 61 |
| 15 | 3  | 18 |
| 0  | 1  | 1  |
| 33 | 12 | 45 |
| 24 | 8  | 32 |

---

|    |    |    |
|----|----|----|
| 13 | 5  | 18 |
| 45 | 18 | 63 |
| 1  | 0  | 1  |
| 50 | 10 | 60 |
| 44 | 8  | 52 |
| 6  | 4  | 10 |
| 1  | 2  | 3  |
| 22 | 1  | 23 |
| 9  | 5  | 14 |
| 31 | 18 | 49 |
| 1  | 0  | 1  |
| 18 | 4  | 22 |
| 39 | 9  | 48 |
| 11 | 2  | 13 |
| 7  | 1  | 8  |
| 9  | 0  | 9  |
| 3  | 1  | 4  |
| 21 | 2  | 23 |
| 2  | 1  | 3  |
| 8  | 1  | 9  |
| 17 | 7  | 24 |
| 1  | 0  | 1  |
| 5  | 0  | 5  |
| 7  | 4  | 11 |

---

|    |    |    |
|----|----|----|
| 3  | 0  | 3  |
| 42 | 14 | 56 |
| 9  | 0  | 9  |
| 34 | 5  | 39 |
| 3  | 1  | 4  |
| 14 | 2  | 16 |
| 23 | 7  | 30 |
| 7  | 5  | 12 |
| 3  | 0  | 3  |
| 48 | 17 | 65 |
| 13 | 7  | 20 |
| 41 | 25 | 66 |

|    |    |    |
|----|----|----|
| 1  | 2  | 3  |
| 22 | 4  | 26 |
| 12 | 3  | 15 |
| 36 | 10 | 46 |
| 1  | 1  | 2  |
| 29 | 11 | 40 |
| 22 | 2  | 24 |
| 8  | 0  | 8  |
| 6  | 2  | 8  |
| 2  | 6  | 8  |
| 27 | 11 | 38 |
| 7  | 3  | 10 |

---
