# Supplementary material for: Attraction of Lutzomyia longipalpis to synthetic sex-aggregation pheromone: Effect of release rate and proximity of adjacent pheromone sources
Source: PubMed Central journal article supplement (PMC6300254; doi:10.1371/journal.pntd.0007007), 2018-12-19
Supplement: pntd.0007007.s003.pdf [file pntd.0007007.s003.pdf]

S3 Table. Experiment 2.  $\beta$  coefficients convergence. For each coefficient the mean and variance are reported for the last three MCMC sub-chains (e.g. from 70,001 to 80,000; from 80,001 to 90,000; and from 90,001 to 100,000). Diff (%) is the proportion of variation in the mean and variance compared to the mean of the means and the mean of the variances. Inter, is the intercept; test is the variable containing test and controls (0 for controls and 1 for tests); ch is the interaction between test and house; cd is the interaction between test and distance; h is the house (house number 2, 3 and 4); and d is the distance (10m, 20m and 30m).

| <b>Coeff.</b> | <b>Mean1</b> | <b>Mean2</b> | <b>Mean3</b> | <b>Diff(%)</b> |  | <b>Var1</b> | <b>Var2</b> | <b>Var3</b> | <b>Diff(%)</b> |
|---------------|--------------|--------------|--------------|----------------|--|-------------|-------------|-------------|----------------|
| <b>Inter</b>  | 3.355        | 3.341        | 3.344        | 0.432          |  | 0.023       | 0.026       | 0.021       | 20.046         |
| <b>test</b>   | 1.702        | 1.722        | 1.709        | 1.131          |  | 0.027       | 0.031       | 0.027       | 14.866         |
| <b>h2</b>     | -0.087       | -0.070       | -0.073       | 21.229         |  | 0.060       | 0.051       | 0.054       | 16.606         |
| <b>h3</b>     | -0.322       | -0.302       | -0.318       | 6.363          |  | 0.024       | 0.023       | 0.024       | 1.094          |
| <b>h4</b>     | 1.071        | 1.078        | 1.076        | 0.656          |  | 0.093       | 0.085       | 0.096       | 12.495         |
| <b>d10</b>    | 0.137        | 0.136        | 0.152        | 10.770         |  | 0.083       | 0.084       | 0.089       | 6.420          |
| <b>d20</b>    | 0.767        | 0.780        | 0.775        | 1.679          |  | 0.026       | 0.029       | 0.030       | 12.351         |
| <b>d30</b>    | 1.023        | 1.019        | 1.026        | 0.651          |  | 0.042       | 0.043       | 0.048       | 12.026         |
| <b>ch2</b>    | -0.451       | -0.442       | -0.458       | 3.558          |  | 0.080       | 0.064       | 0.070       | 21.394         |
| <b>ch3</b>    | -0.529       | -0.543       | -0.529       | 2.675          |  | 0.032       | 0.030       | 0.033       | 11.937         |
| <b>ch4</b>    | -0.758       | -0.742       | -0.775       | 4.339          |  | 0.127       | 0.111       | 0.120       | 13.029         |
| <b>cd10</b>   | 0.234        | 0.208        | 0.226        | 11.944         |  | 0.106       | 0.108       | 0.114       | 6.966          |
| <b>cd20</b>   | -0.279       | -0.296       | -0.291       | 5.913          |  | 0.033       | 0.036       | 0.036       | 8.301          |
| <b>cd30</b>   | -0.049       | -0.076       | -0.061       | 44.959         |  | 0.056       | 0.057       | 0.062       | 10.087         |
