# Supplementary material for: Attraction of Lutzomyia longipalpis to synthetic sex-aggregation pheromone: Effect of release rate and proximity of adjacent pheromone sources
Source: PubMed Central journal article supplement (PMC6300254; doi:10.1371/journal.pntd.0007007), 2018-12-19
Supplement: pntd.0007007.s004.pdf [file pntd.0007007.s004.pdf]

S4 Table a (male)

| Coeff.       | Mean     | Variance | CR.0.05  | CR.0.95  |
|--------------|----------|----------|----------|----------|
| <b>BI2</b>   | 3.628698 | 0.026954 | 3.359849 | 3.899967 |
| <b>BI5</b>   | 3.915633 | 0.020552 | 3.67941  | 4.152306 |
| <b>BI10</b>  | 4.265358 | 0.01408  | 4.069575 | 4.46264  |
| <b>BI20</b>  | 3.421459 | 0.033824 | 3.121494 | 3.730014 |
| <b>BI50</b>  | 4.357963 | 0.012636 | 4.171984 | 4.542898 |
| <b>Bcl2</b>  | 0.599803 | 0.041827 | 0.257819 | 0.932112 |
| <b>Bcl5</b>  | 1.132483 | 0.026987 | 0.863323 | 1.399595 |
| <b>Bcl10</b> | 1.313775 | 0.018149 | 1.090374 | 1.534425 |
| <b>Bcl20</b> | 1.781539 | 0.039519 | 1.451616 | 2.109916 |
| <b>Bcl50</b> | 1.588366 | 0.015314 | 1.383703 | 1.793616 |

S4 Table b (female)

| Coeff.       | Mean     | Variance | CR.0.05  | CR.0.95  |
|--------------|----------|----------|----------|----------|
| <b>BI2</b>   | 3.04932  | 0.048404 | 2.690802 | 3.411015 |
| <b>BI5</b>   | 2.717343 | 0.066092 | 2.293151 | 3.139511 |
| <b>BI10</b>  | 3.314842 | 0.037037 | 3.00102  | 3.632147 |
| <b>BI20</b>  | 2.037754 | 0.125539 | 1.455286 | 2.632318 |
| <b>BI50</b>  | 2.954296 | 0.052863 | 2.578414 | 3.326654 |
| <b>Bcl2</b>  | 0.284829 | 0.082582 | -0.19253 | 0.758526 |
| <b>Bcl5</b>  | 1.255314 | 0.086167 | 0.775174 | 1.743136 |
| <b>Bcl10</b> | 1.107696 | 0.04946  | 0.742806 | 1.471249 |
| <b>Bcl20</b> | 2.204682 | 0.139845 | 1.590475 | 2.821327 |
| <b>Bcl50</b> | 1.807886 | 0.061213 | 1.399844 | 2.211458 |
