# Supplementary material for: Attraction of Lutzomyia longipalpis to synthetic sex-aggregation pheromone: Effect of release rate and proximity of adjacent pheromone sources
Source: PubMed Central journal article supplement (PMC6300254; doi:10.1371/journal.pntd.0007007), 2018-12-19
Supplement: pntd.0007007.s005.pdf [file pntd.0007007.s005.pdf]

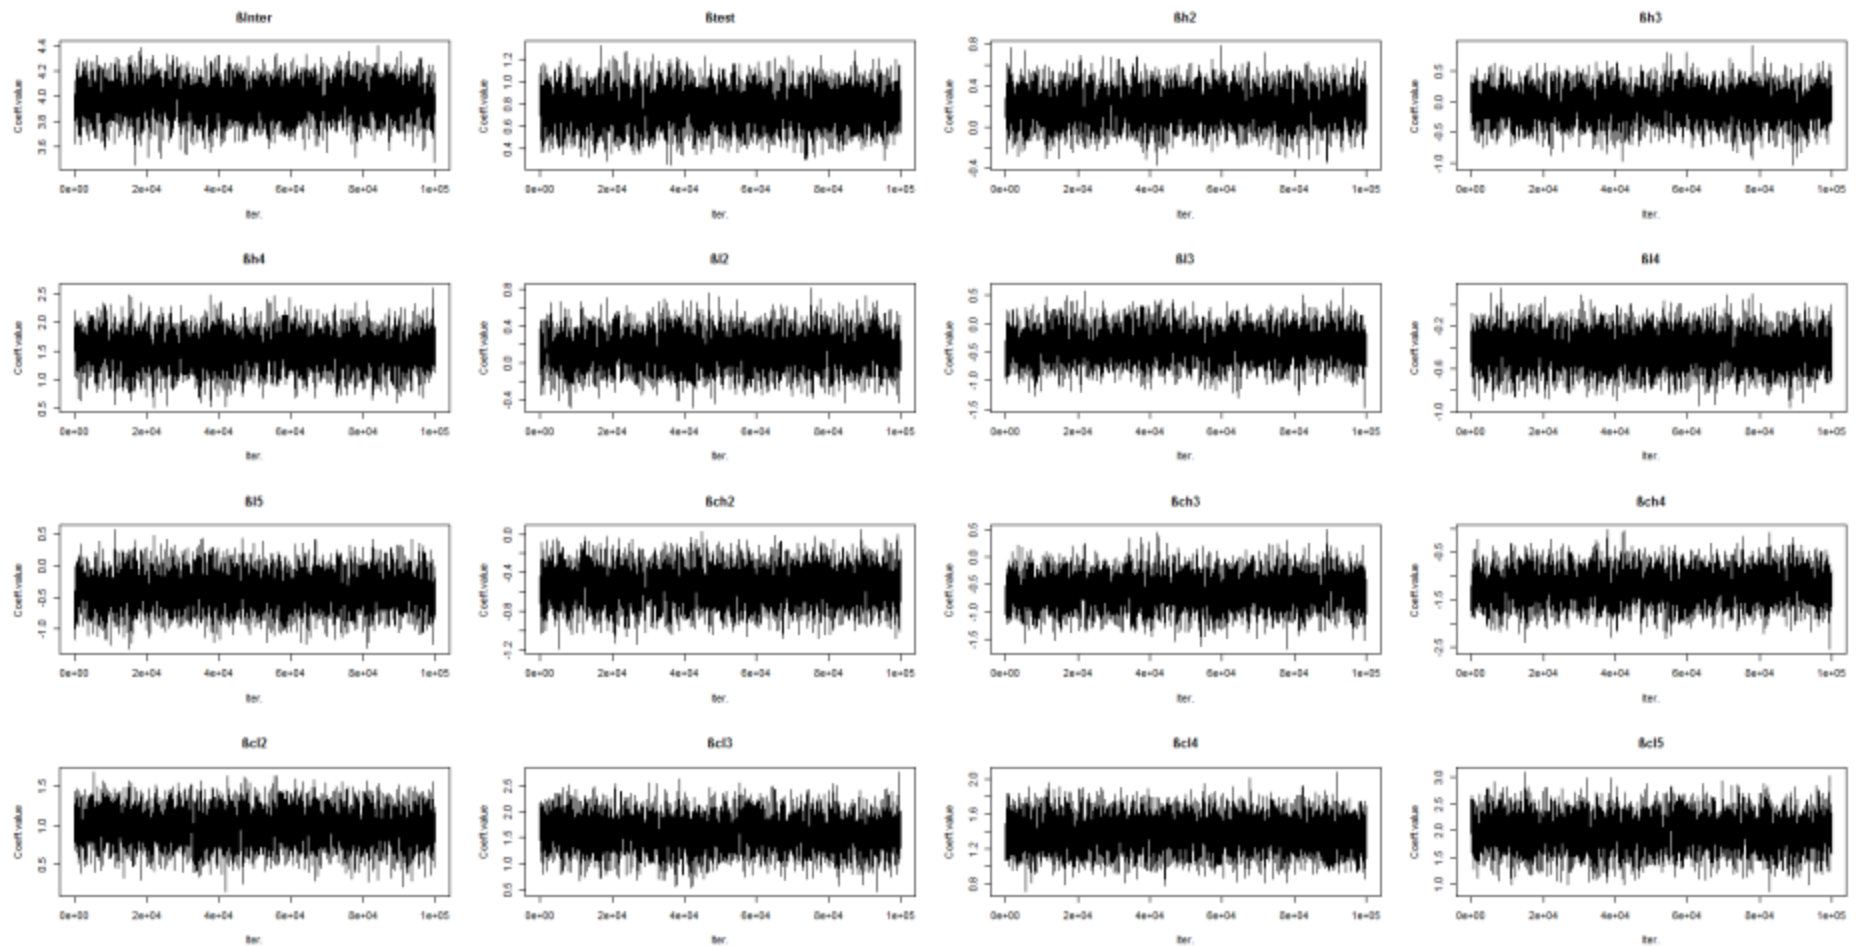

S1 Fig. Experiment 1. MCMC traces for the  $\beta$  coefficients. Explanation of titles after the  $\beta$ : **inter**, is the intercept of the model; **test** is the variable containing test and controls (0 for controls and 1 for tests); **ch** is the interaction between test and house; **cl** is the interaction between test and pheromones; **h** is house (house number 2, 3 and 4); and **I** refers to pheromone lures (2, for 5 lures; 3 for 10 lures; 4 for 20 lures; and 5 for 50 lures).
