# Supplementary material for: Attraction of Lutzomyia longipalpis to synthetic sex-aggregation pheromone: Effect of release rate and proximity of adjacent pheromone sources
Source: PubMed Central journal article supplement (PMC6300254; doi:10.1371/journal.pntd.0007007), 2018-12-19
Supplement: pntd.0007007.s009.pdf [file pntd.0007007.s009.pdf]

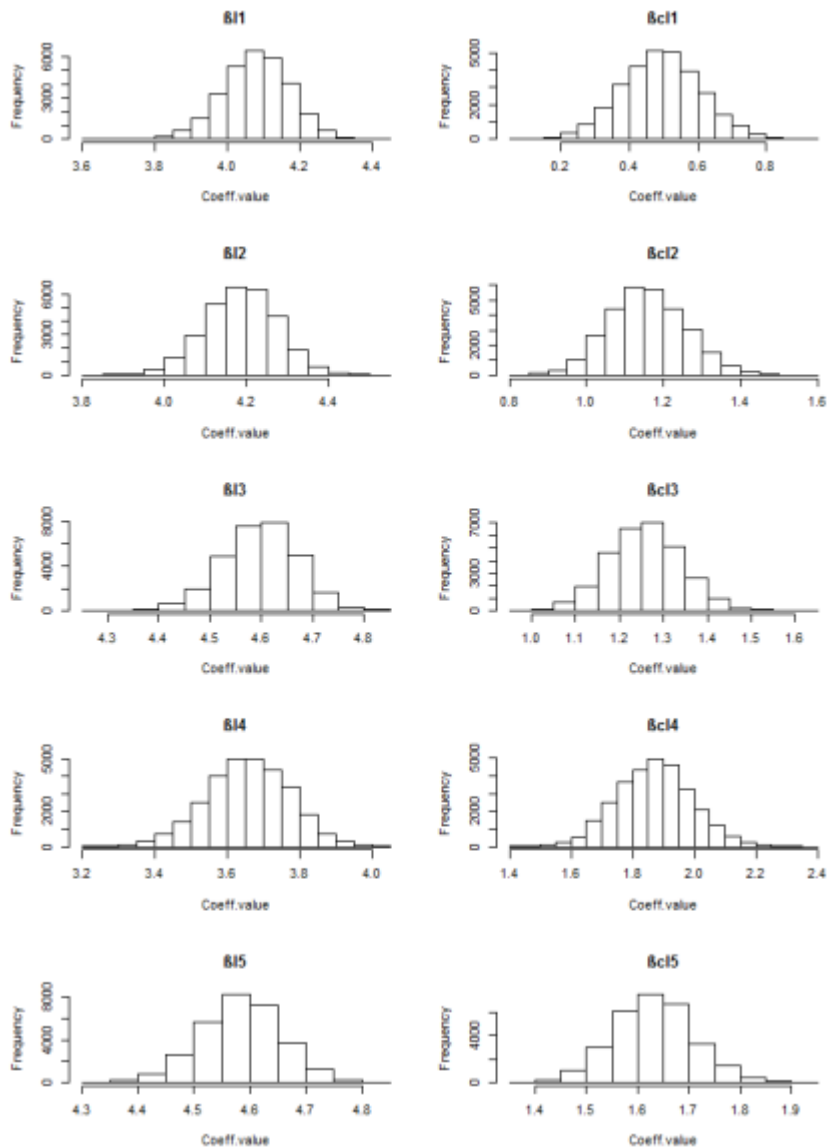

S5 Fig Experiment 1.  $\beta$  coefficients histograms from the posterior distributions of the number of pheromone lures and their interaction with test/control. Explanation of titles: l is the number of pheromone lures (1 is 2 lures; 2 is 5 lures; 3 is 10 lures; 4 is 20 lures; and 5 is 50 lures); cl is the interaction between test and pheromone.
